# Supplementary material
Source: publisher site journal article supplement (https://www.spandidos-publications.com/1113/downloadSupplementary)

Figure S1. DJ-1 influences esophageal squamous cell carcinoma intraperitoneal metastasis in nude BALB/c mice. (A) Images of the intraperitoneal metastasis in the LV-DJ-1 and control groups were obtained with live animal imaging at day 28. (B) Images of the intraperitoneal metastasis in the LV-siRNA-DJ-1 and control groups were obtained with live animal imaging at day 28. LV-DJ-1, lentivirus overexpressing DJ-1; LV-con, lentivirus control; LV-siRNA-DJ-1, lentivirus encoding DJ-1 small interfering RNA; LV-siRNA-con, lentivirus encoding control small interfering RNA.

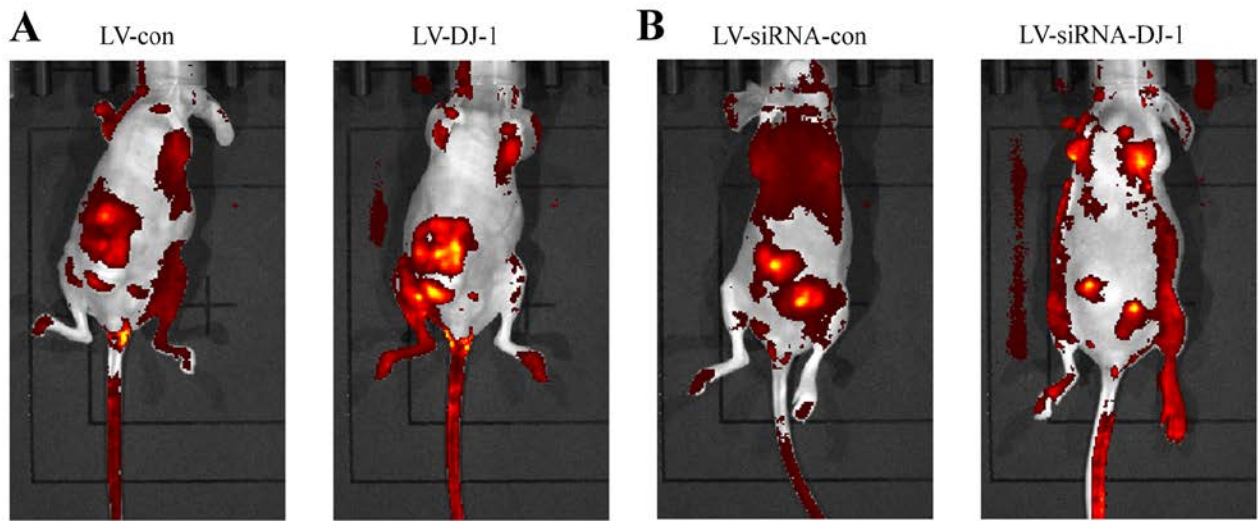

Supplement: Supplementary file 1 [file downloadSupplementary]
